# Supplementary material for: Involvement of Mitochondrial Dysfunction in the Inflammatory Response in Human Mesothelial Cells from Peritoneal Dialysis Effluent
Source: MDPI journal article supplement (doi:10.3390/antiox11112184), 2022-11-04
Supplement: s1 [file s1]

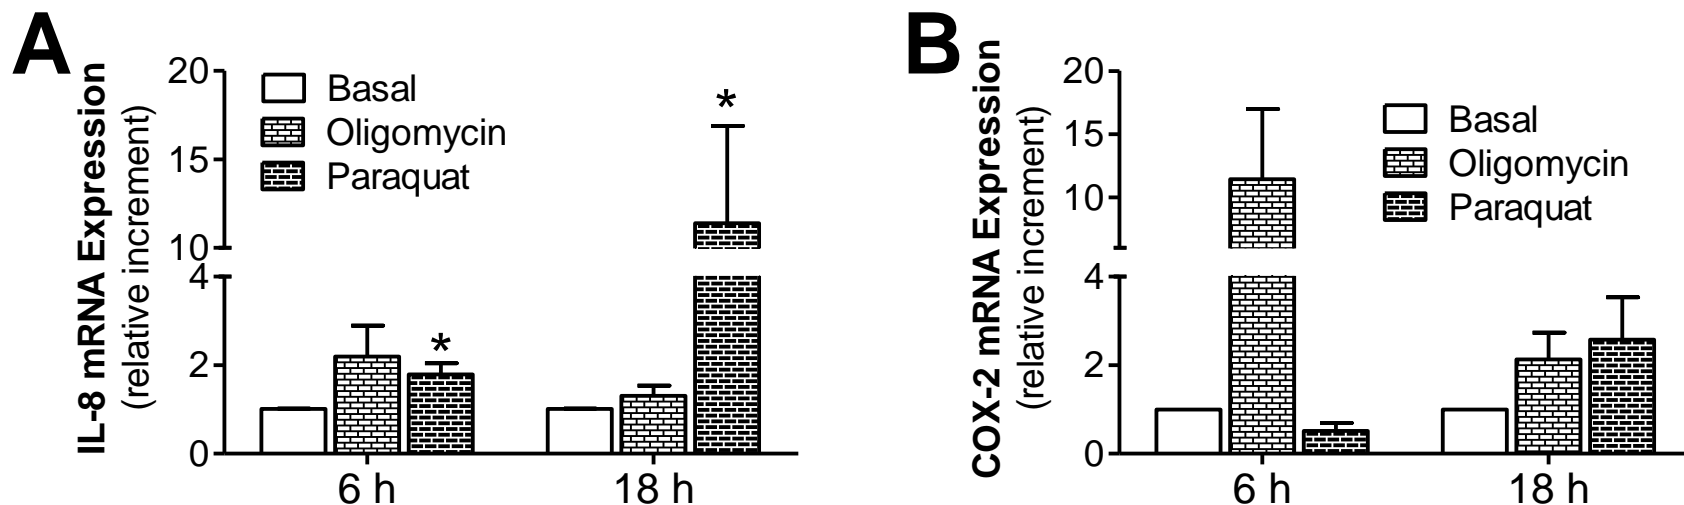

**Supplementary Figure S1. Mitochondrial dysfunction triggers a low level of inflammatory response in human mesothelial cells.** (A) IL-8 and (B) COX-2 mRNA expression in Met5A cells incubated under basal conditions or with the selective mitochondrial respiratory chain inhibitors oligomycin (10  $\mu$ g/ml) or paraquat (1 mM) for 6 and 18 h (n=6 and n=5, respectively). Data are expressed as the mean  $\pm$  SEM of mRNA expression fold change relative to basal condition. \* $P \leq 0.05$  vs. basal.
